# Supplementary material
Source: PubMed Central journal article supplement (PMC7529980)

## Electronic Supplementary Material

### ESM Figure 1: Transmission electron microscopy confirms aggregation of synthetic hIAPP into amyloid fibrils

**Methods and Results:** 16  $\mu\text{m}$  synthetic hIAPP was allowed to aggregate at pH 7.4 and 25°C. Plateau of hIAPP aggregation occurred after 24 h as assessed by thioflavin T assay. An aliquot of aggregated hIAPP was removed at the end of the kinetics experiment and blotted onto a carbon-formvar coated 300-mesh copper grid for 1 min, then negatively stained with saturated uranyl acetate for 1 min and subjected to transmission electron microscopy (TEM). Images were collected at the Stony Brook University Microscopy Center. Scale bar represents 100nm.

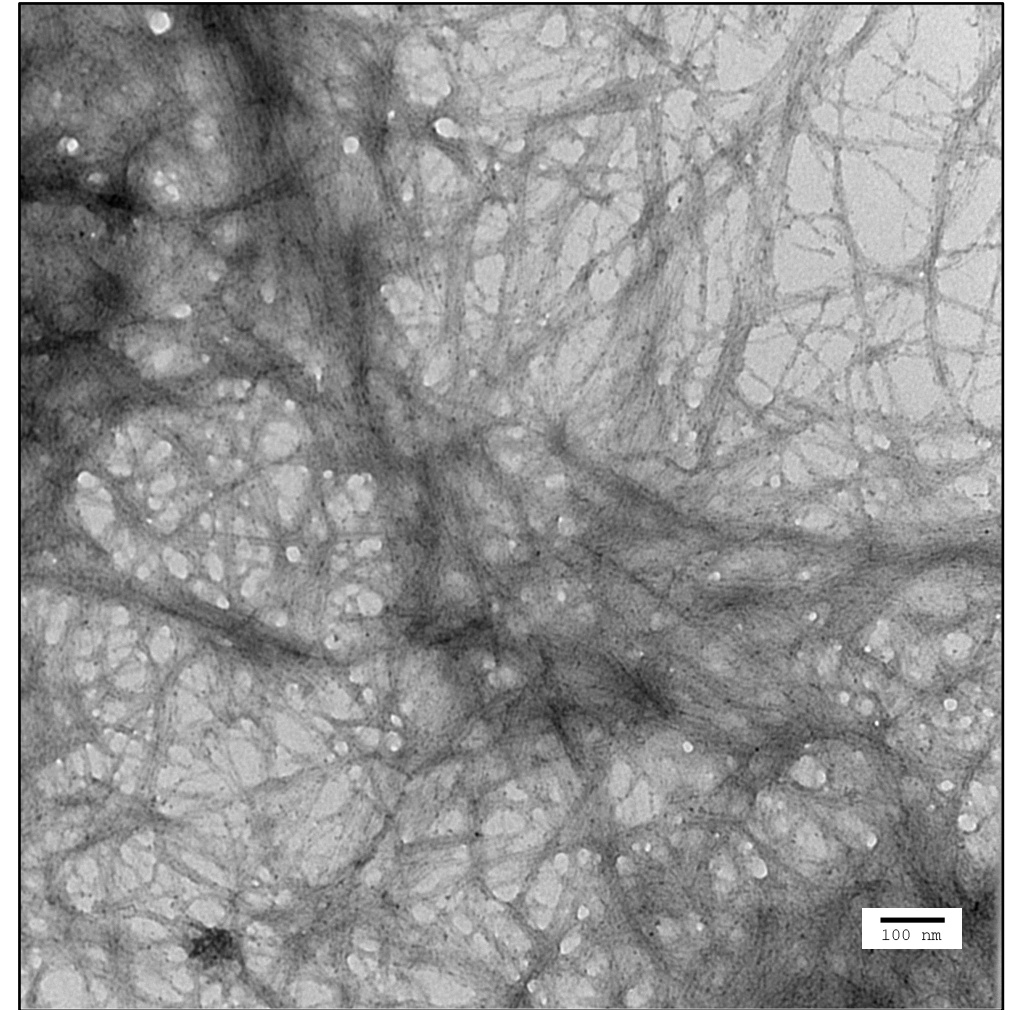

Supplement: NIHMS1616505-supplement-125_2020_5232_MOESM1_ESM.pdf [file NIHMS1616505-supplement-125_2020_5232_MOESM1_ESM.pdf]
